# Supplementary material
Source: PubMed Central journal article supplement (PMC4790805)

Fig A2

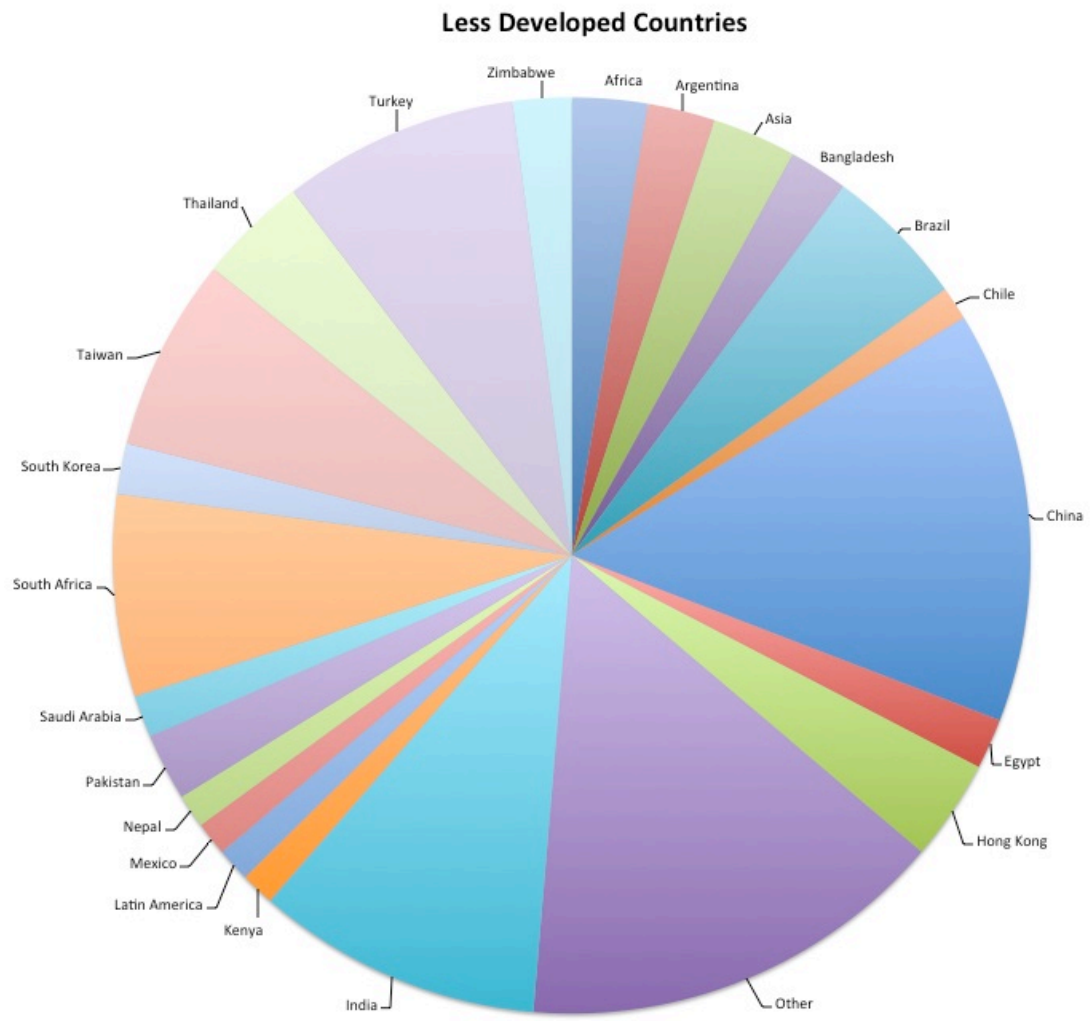

# More Developed Countries

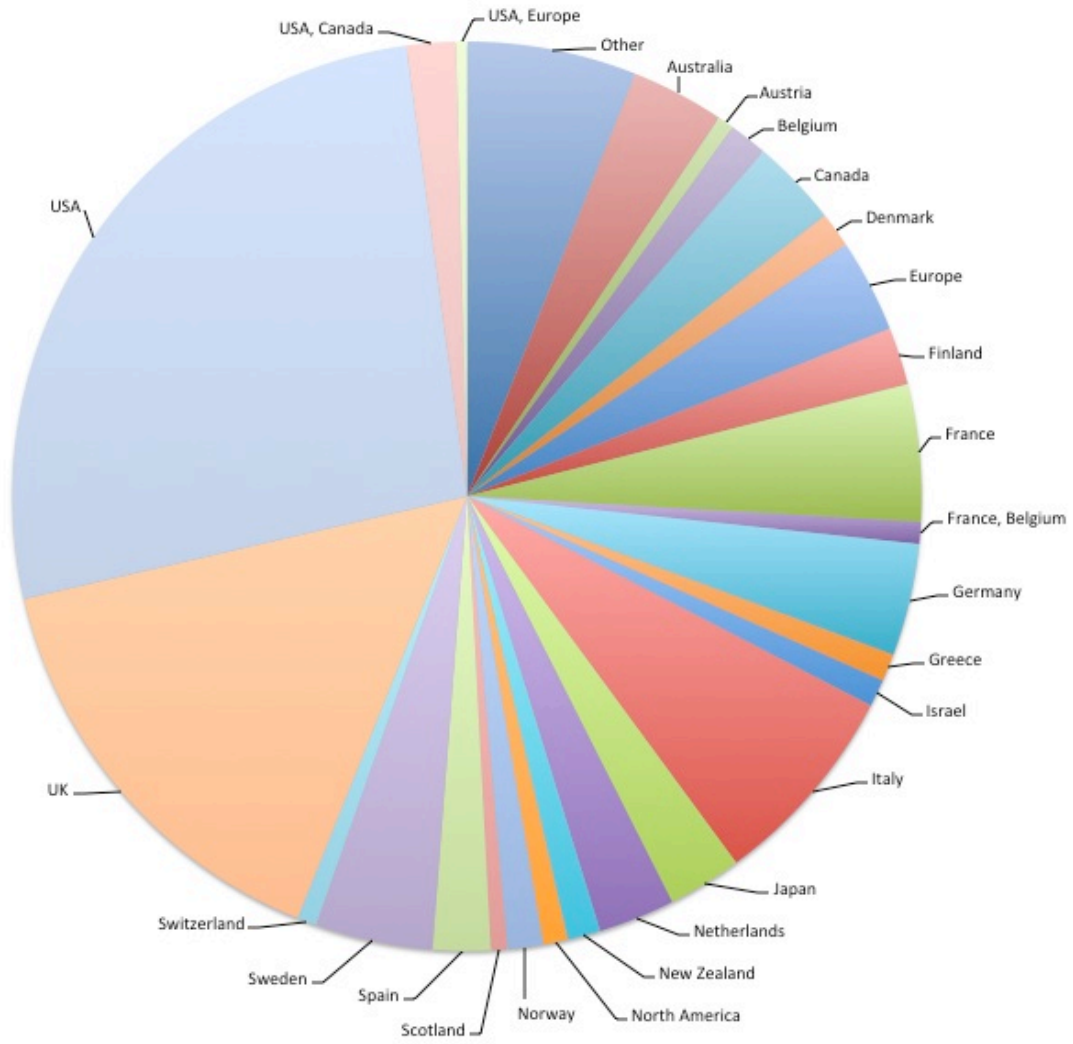

Supplement: pano006426.wf1_default.pdf [file pano006426.wf1_default.pdf]
